# Supplementary material for: Site-specific HNK-1 epitope on alternatively spliced fibronectin type-III repeats in tenascin-C promotes neurite outgrowth of hippocampal neurons through contactin-1
Source: PubMed Central journal article supplement (PMC6328190; doi:10.1371/journal.pone.0210193), 2019-01-10
Supplement: pone.0210193.s007.pdf [file pone.0210193.s007.pdf]

| Fig. #                     | Mean   | SD    | SEM  | Statistical method used                                       | P value     | n   |
|----------------------------|--------|-------|------|---------------------------------------------------------------|-------------|-----|
| Fig. 2C                    |        |       |      |                                                               |             |     |
| PDL                        | 107.40 | 21.74 | 2.74 | One-way ANOVA<br>with Tukey's multiple<br>comparison posttest | ***p<0.001  | 63  |
| FNx7 HNK-1(-)              | 125.98 | 31.17 | 2.65 |                                                               |             | 138 |
| FNx7 HNK-1(+)              | 144.61 | 6.56  | 3.81 |                                                               |             | 43  |
| Fig. 3A                    |        |       |      |                                                               |             |     |
| PDL                        | 111.90 | 18.24 | 1.60 | One-way ANOVA<br>with Tukey's multiple<br>comparison posttest | ***p<0.001  | 130 |
| FNx6 HNK-1(-)              | 133.45 | 24.97 | 1.97 |                                                               |             | 161 |
| FNx6 HNK-1(+)              | 145.12 | 30.98 | 2.51 |                                                               |             | 152 |
| Fig. 3B                    |        |       |      |                                                               |             |     |
| PDL                        | 109.13 | 25.51 | 2.23 | One-way ANOVA<br>with Tukey's multiple<br>comparison posttest | n.s. p>0.05 | 131 |
| FNx5 HNK-1(-)              | 124.26 | 22.54 | 1.45 |                                                               | ***p<0.001  | 241 |
| FNx5 HNK-1(+)              | 128.43 | 29.70 | 2.48 |                                                               | 143         |     |
| Fig. 3C                    |        |       |      |                                                               |             |     |
| PDL                        | 111.50 | 36.21 | 3.90 | One-way ANOVA<br>with Tukey's multiple<br>comparison posttest | n.s. p>0.05 | 86  |
| FNx3 HNK-1(-)              | 108.72 | 26.24 | 2.36 |                                                               |             | 124 |
| FNx3 HNK-1(+)              | 108.92 | 24.47 | 2.55 |                                                               |             | 92  |
| Fig. 4C                    |        |       |      |                                                               |             |     |
| PDL                        | 108.83 | 21.64 | 1.60 | One-way ANOVA<br>with Tukey's multiple<br>comparison posttest | n.s. p>0.05 | 184 |
| N1534Q HNK-1(-)            | 122.98 | 32.06 | 2.28 |                                                               | ***p<0.001  | 197 |
| N1534Q HNK-1(+)            | 124.67 | 24.60 | 1.76 |                                                               | 195         |     |
| Fig. 5                     |        |       |      |                                                               |             |     |
| PDL + normal IgG           | 116.52 | 24.69 | 1.67 | One-way ANOVA<br>with Tukey's multiple<br>comparison posttest | n.s. p>0.05 | 219 |
| PDL + CNTN Ab              | 118.53 | 28.81 | 2.53 |                                                               | ***p<0.001  | 130 |
| FNx7 HNK-1(-) + normal IgG | 134.21 | 26.87 | 2.28 |                                                               | 139         |     |
| FNx7 HNK-1(-) + CNTN Ab    | 116.55 | 19.38 | 1.52 |                                                               | 163         |     |
| FNx7 HNK-1(+) + normal IgG | 142.33 | 32.86 | 2.65 |                                                               | 154         |     |
| FNx7 HNK-1(+) + CNTN Ab    | 119.63 | 25.79 | 2.00 |                                                               | 166         |     |

| S2 Fig.                           |        |       |       |                                                               |               |     |
|-----------------------------------|--------|-------|-------|---------------------------------------------------------------|---------------|-----|
| Non treatment                     | 94.99  | 31.48 | 3.36  | One-way ANOVA<br>with Tukey's multiple<br>comparison posttest | n.s. $p>0.05$ | 88  |
| FNx7 HNK-1(-) 5 $\mu\text{g/ml}$  | 106.15 | 44.79 | 11.65 |                                                               |               | 83  |
| FNx7 HNK-1(+) 5 $\mu\text{g/ml}$  | 101.56 | 39.98 | 5.34  |                                                               |               | 56  |
| Non treatment                     | 95.46  | 32.08 | 3.48  |                                                               |               | 85  |
| FNx7 HNK-1(-) 10 $\mu\text{g/ml}$ | 94.07  | 42.04 | 4.67  |                                                               |               | 81  |
| FNx7 HNK-1(+) 10 $\mu\text{g/ml}$ | 104.63 | 35.01 | 4.81  |                                                               |               | 53  |
| S3 Fig.                           |        |       |       |                                                               |               |     |
| PDL with DMSO                     | 124.78 | 28.72 | 2.76  | One-way ANOVA<br>with Tukey's multiple<br>comparison posttest | n.s. $p>0.05$ | 108 |
| PDL with U73122                   | 122.13 | 29.34 | 2.96  |                                                               |               | 98  |
| FNx7 HNK-1(-) with U73122         | 128.43 | 32.28 | 2.64  |                                                               |               | 149 |
| FNx7 HNK-1(+) with U73122         | 121.38 | 31.34 | 3.22  |                                                               |               | 95  |
| S4A Fig.                          |        |       |       |                                                               |               |     |
| PDL                               | 131.46 | 38.46 | 4.53  | One-way ANOVA<br>with Tukey's multiple<br>comparison posttest | n.s. $p>0.05$ | 72  |
| FNx7 HNK-1(-)                     | 154.52 | 37.56 | 3.27  |                                                               | ** $p<0.01$   | 132 |
| FNx7 HNK-1(+)                     | 152.79 | 42.62 | 3.92  |                                                               | *** $p<0.001$ | 118 |
